# Supplementary material for: Seasonal cycling of zinc and cobalt in the Southeast Atlantic along the GEOTRACES GA10 section
Source: Copernicus journal article supplement (doi:10.5194/bg-2020-42), 2020-03-06
Supplement: Supplementary file 1 [file bg-2020-42-supplement.pdf]

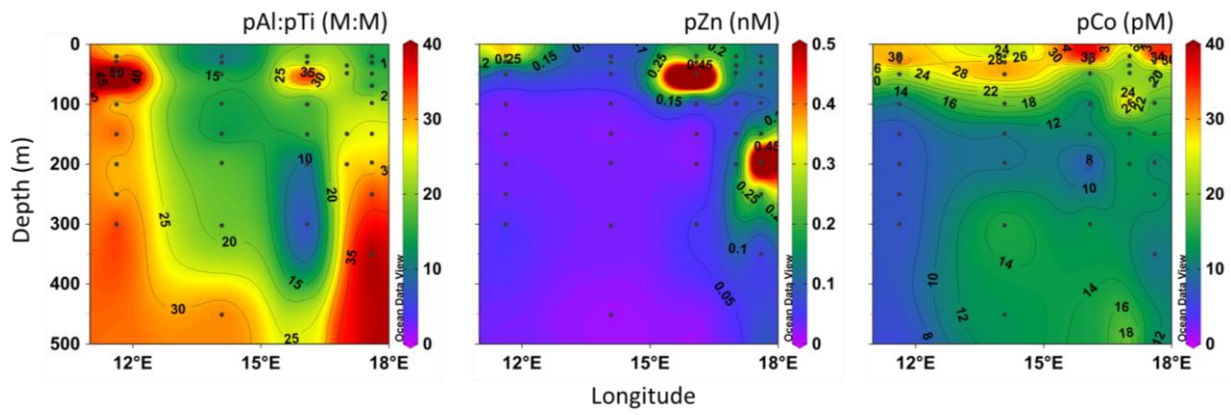

Supplementary figure 1. Upper 500 m distribution of particulate Al:Ti ratio alongside particulate Zn and Co between 11 and 18°E during the late spring (D357-2).

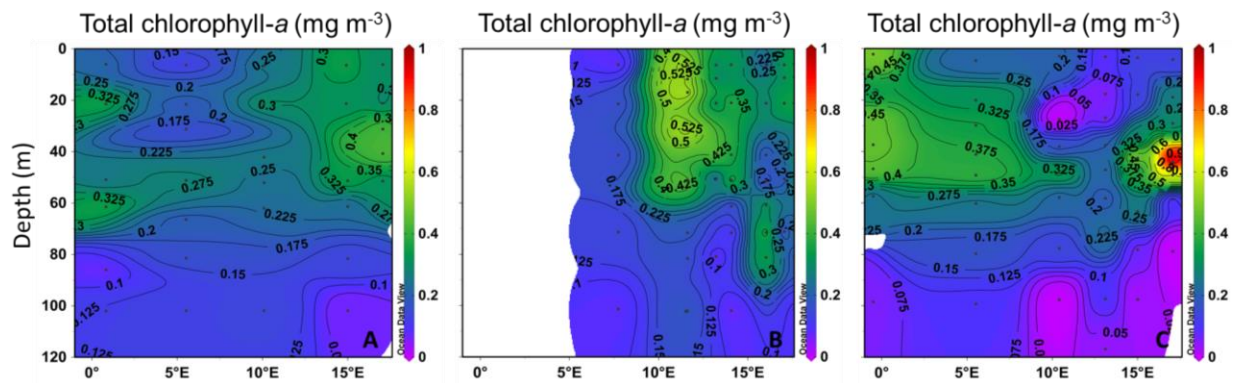

Supplementary figure 2. Upper 50 m distributions of total chlorophyll-a during the early spring (A; D357-1), late spring (B; D357-2) and summer (C; JC068) transects.
